# Supplementary material for: Noradrenergic projections from the locus coeruleus to the amygdala constrain fear memory reconsolidation
Source: eLife journal article supplement (doi:10.7554/elife.57010), 2020-05-18
Supplement: supp [file elife-57010-supp-v1.zip]

Archive with 9 entries (9 files):
- elife_poa_e57010_Figure_2_source_data_1.xlsx
- elife_poa_e57010_Figure_3_source_data_1.xlsx
- elife_poa_e57010_Figure_4_source_data_1.xlsx
- elife_poa_e57010_Figure_5_source_data_1.xlsx
- elife_poa_e57010_Transparent_Reporting_File.pdf
- elife_poa_e57010_Supplementary_file_1.xlsx
- elife_poa_e57010_Supplementary_file_2.xlsx
- elife_poa_e57010_Supplementary_file_3.xlsx
- elife_poa_e57010_Supplementary_file_4.xlsx
