# Supplementary material for: Noradrenergic projections from the locus coeruleus to the amygdala constrain fear memory reconsolidation
Source: eLife journal article supplement (doi:10.7554/elife.57010), 2020-05-18
Supplement: supp [file elife-57010-supp-v1.zip › elife_poa_e57010_Figure_2_source_data_1.xlsx]

## Sheet: Figure 1.A
training	test
1P	59.6667
1P	89.3333
1P	79.6667
1P	29.3333
1P	96
1P	64
1P	52
1P	88
1P	89
1P	19.3333
1P	96.6667
1P	82.6667
1P	57.3333
1P	83.6667
1P	86
10P	77.6667
10P	89.6667
10P	87
10P	92.6667
10P	88
10P	86.6667
10P	88
10P	83
10P	94.3333
10P	95.6667
10P	82.3333
10P	80.6667
10P	76
10P	75
10P	98.6667

## Sheet: Figure 2.B
training	Tone 1-5	Tone 6-10	Tone-11-15	Tone 16-20	test
1P	52.6667	3.46667	1.93333	0	24.3333
1P	5.46667	2.73333	0	0	0
1P	79.1333	42.0667	14.0667	28.8	41.3333
1P	71.6667	4.06667	1.93333	3.13333	5.33333
1P	56.2	43.6	29.4	0	1.33333
1P	68.6	34.5333	74.3333	36.4667	10
1P	31.3667	23.9333	13.1133	15.3933	17
10P	99.1333	93.1333	86.0667	87	88.3333
10P	86.8667	90.6667	36.2	25.2	84
10P	92	83.2667	56.7333	11.7333	88.6667
10P	96.6667	87.4	92.8	77.4667	75.3333
10P	91.6667	83.8667	62.4	86.7333	82.3333
10P	95.2667	80.2	49.9333	42.2667	86
10P	75.3733	11	46.0667	90	88.3333
10P	94.7333	16.7067	96.36	87.4	68

## Sheet: Figure 2.C
training	postreactivation	reactivation	test
1P	veh	56.6667	60
1P	veh	83.3333	100
1P	veh	63.3333	73.3333
1P	veh	93.3333	56.6667
1P	veh	76.6667	80
1P	veh	50	100
1P	veh	63.3333	63.3333
1P	veh	43.3333	66.6667
1P	veh	73.3333	76.6667
1P	anisomycin	80	20
1P	anisomycin	16.6667	0
1P	anisomycin	33.3333	10
1P	anisomycin	93.3333	73.3333
1P	anisomycin	93.3333	50
1P	anisomycin	63.3333	40
1P	anisomycin	26.6667	0
1P	anisomycin	36.6667	10
1P	anisomycin	100	40
1P	anisomycin	100	36.6667
10P	veh	80	70
10P	veh	86.6667	96.6667
10P	veh	90	80
10P	veh	86.6667	76.6667
10P	veh	83.3333	66.6667
10P	veh	100	100
10P	veh	83.3333	93.3333
10P	veh	90	93.3333
10P	veh	73.3333	96.6667
10P	veh	100	80
10P	anisomycin	63.3333	95.5556
10P	anisomycin	80	72.2222
10P	anisomycin	86.6667	72.2222
10P	anisomycin	90	82.2222
10P	anisomycin	86.6667	87.7778
10P	anisomycin	100	94.4444
10P	anisomycin	63.3333	87.7778
10P	anisomycin	83.3333	88.8889
10P	anisomycin	100	100
10P	anisomycin	100	93.3333
