# Supplementary material for: Noradrenergic projections from the locus coeruleus to the amygdala constrain fear memory reconsolidation
Source: eLife journal article supplement (doi:10.7554/elife.57010), 2020-05-18
Supplement: supp [file elife-57010-supp-v1.zip › elife_poa_e57010_Figure_3_source_data_1.xlsx]

## Sheet: Figure 3.A
group	glun2b/gapdh
HC	106.831
HC	93.1694
HC	100
1P	316.263
1P	453.326
1P	224.907
1P	108.074
1P	229.573
1P	375.752
10P	133.948
10P	101.963
10P	31.1731
10P	110.575
10P	151.992
group	glua2/gapdh
HC	114.878
HC	114.879
HC	93.7206
HC	76.8713
HC	78.5972
HC	121.054
1P	210.201
1P	177.731
1P	133.418
1P	173.856
1P	164.459
1P	183.035
1P	158.235
1P	100.92
1P	149.828
1P	286.149
10P	231.312
10P	390.091
10P	243.453
10P	209.893
10P	239.146
10P	315.626

## Sheet: Figure 3.B
group	glua2/gapdh synaptic
HC	168.4
HC	116.295
HC	95.2387
HC	91.121
HC	37.8246
HC	91.121
1P 1H	356.6
1P 1H	69.0855
1P 1H	121.934
1P 1H	44.6632
1P 1H	23.2119
1P 1H	102.123
1P 1H	79.2758
1P 1H	23.2119
1P 1H	102.123
1P 1H	79.2758
1P 24H	411.369
1P 24H	318.78
1P 24H	192.87
1P 24H	169.942
1P 24H	339.011
1P 24H	92.1439
1P 24H	629.596
1P 24H	169.942
1P 24H	339.011
1P 24H	92.1439
1P 24H	629.596
group	glua2/gapdh extrasynaptic
HC	115.597
HC	84.4035
HC	156.571
HC	43.4289
1P 1H	201.203
1P 1H	263.734
1P 1H	153.633
1P 1H	407.592
1P 1H	236.803
1P 1H	202.937
1P 24H	31.8567
1P 24H	30.0339
1P 24H	133.761
1P 24H	94.2874
1P 24H	191.631
1P 24H	197.744
1P 24H	229.555
1P 24H	38.5655

## Sheet: Figure 3.C
group	glua2/gapdh synaptic
HC	71.2926
HC	134.249
HC	134.068
HC	53.2205
HC	93.5726
HC	113.597
10P_1H	266.844
10P_1H	453.619
10P_1H	692.439
10P_1H	1346.25
10P_1H	938.332
10P_1H	2332.88
10P_1H	286.379
10P_1H	2371.57
10P_1H	412.11
10P_24H	679.773
10P_24H	605.919
10P_24H	1758.65
10P_24H	518.782
10P_24H	1368.73
10P_24H	1118.01
10P_24H	1053.6
10P_24H	1479.5
10P_24H	550.063
group	glua2/gapdh extrasynaptic
HC	69.5012
HC	173.963
HC	56.5354
10P_1H	57.9563
10P_1H	150.516
10P_1H	24.7209
10P_1H	71.2154
10P_1H	157.443
10P_24H	143.477
10P_24H	132.124
10P_24H	70.9059
10P_24H	85.5043
10P_24H	88.5192
10P_24H	69.3483
10P_24H	79.4115
