# Supplementary material for: Noradrenergic projections from the locus coeruleus to the amygdala constrain fear memory reconsolidation
Source: eLife journal article supplement (doi:10.7554/elife.57010), 2020-05-18
Supplement: supp [file elife-57010-supp-v1.zip › elife_poa_e57010_Figure_4_source_data_1.xlsx]

## Sheet: Figure4.A
group	glun2b/gapdh
veh	185.81
veh	103.21
veh	82.58
veh	43.78
veh	61.61
veh	121.74
veh	103.57
veh	105.05
veh	55.91
veh	136.74
propranolol	122.9
propranolol	183.54
propranolol	178.85
propranolol	236.66
propranolol	71.94
propranolol	101.4
propranolol	146.52
propranolol	148.43
propranolol	175.3
group	glua2/tubulin
veh	80.4866
veh	58.049
veh	161.464
veh	148.064
veh	74.9455
veh	76.9907
propranolol	53.5562
propranolol	24.5783
propranolol	78.4617
propranolol	35.8395
propranolol	51.8053

## Sheet: Figure4.B
pretraining	postreactivation	reactivation	test
veh	veh	100	100
veh	veh	100	100
veh	veh	100	100
veh	veh	80	84.44
veh	veh	100	100
veh	veh	100	92.22
veh	veh	40	88.89
veh	anisomycin	100	95.56
veh	anisomycin	83.33	95.56
veh	anisomycin	100	87.78
veh	anisomycin	80	84.44
veh	anisomycin	100	73.33
veh	anisomycin	60	86.67
veh	anisomycin	100	90
veh	anisomycin	66.67	87.78
propranolol	veh	100	95.56
propranolol	veh	93.33	88.89
propranolol	veh	93.33	72.22
propranolol	veh	80	76.67
propranolol	veh	93.33	44.44
propranolol	veh	100	100
propranolol	veh	90	83.33
propranolol	veh	93.33	100
propranolol	anisomycin	100	51.11
propranolol	anisomycin	80	70
propranolol	anisomycin	100	26.67
propranolol	anisomycin	100	64.44
propranolol	anisomycin	93.33	80
propranolol	anisomycin	86.67	28.89
propranolol	anisomycin	100	32.22
propranolol	anisomycin	100	41.11
