# Supplementary material for: Noradrenergic projections from the locus coeruleus to the amygdala constrain fear memory reconsolidation
Source: eLife journal article supplement (doi:10.7554/elife.57010), 2020-05-18
Supplement: supp [file elife-57010-supp-v1.zip › elife_poa_e57010_Figure_5_source_data_1.xlsx]

## Sheet: Figure4.A
group	cfos counts %1p
1P	84.6154
1P	117.949
1P	97.4359
10P	356.41
10P	376.923
10P	602.564

## Sheet: Figure4.C
pretraining	postreactivation	reactivation	test
tdtomato	vehicle	54.9667	84.2333
tdtomato	vehicle	79	50.7333
tdtomato	vehicle	70.4333	75.5
tdtomato	vehicle	89.4667	75.4667
tdtomato	vehicle	81.8667	73.9
tdtomato	vehicle	94.1667	82.9
tdtomato	vehicle	67.1	73.1667
tdtomato	vehicle	86.9	71.0667
tdtomato	vehicle	81.9333	68.7667
tdtomato	anisomycin	64.2	53.0333
tdtomato	anisomycin	85.2333	69.2667
tdtomato	anisomycin	59.2333	76.6333
tdtomato	anisomycin	91.0333	74.2
tdtomato	anisomycin	46.2	53.7333
tdtomato	anisomycin	80.8333	40.4
tdtomato	anisomycin	74.7333	49.6667
hm4di	vehicle	80	81.9667
hm4di	vehicle	83.3333	67.3
hm4di	vehicle	91.6333	51.0667
hm4di	vehicle	27.4667	59.9
hm4di	vehicle	61.7333	61.1667
hm4di	vehicle	68.9667	59.2667
hm4di	vehicle	78	69.8
hm4di	anisomycin	83.3333	11.7333
hm4di	anisomycin	62.4333	16.1333
hm4di	anisomycin	96.5333	21.8667
hm4di	anisomycin	97.5	23.8333
hm4di	anisomycin	22.0667	3.03333
hm4di	anisomycin	67.8333	29.1333
hm4di	anisomycin	90.2	9.46667
hm4di	anisomycin	95.7333	33.2333
