# Supplementary material for: Noradrenergic projections from the locus coeruleus to the amygdala constrain fear memory reconsolidation
Source: eLife journal article supplement (doi:10.7554/elife.57010), 2020-05-18
Supplement: supp [file elife-57010-supp-v1.zip › elife_poa_e57010_Supplementary_file_1.xlsx]

## Sheet: Figure 2
Figure 2.A
Independent Samples T-Test
		statistic	df	p	Cohen's d
test	Student's t	-2.31	28	0.029	-0.843
Figure 2.B
MIXED ANOVA
Within Subjects Effects
	Sum of Squares	df	Mean Square	F	p	η²G
bin	10516	4	2629	6.21	< .001	0.244
bin ✻ group	1798	4	450	1.06	0.385	0.052
Residual	22012	52	423
Between Subjects Effects
	Sum of Squares	df	Mean Square	F	p	η²G
group	47429	1	47429	58.2	< .001	0.593
Residual	10598	13	815
Tukey Post Hoc Comparisons
Comparison
bin	group		bin	group	Mean Difference	SE	df	t	ptukey
1_5 min	1P	-	1_5 min	10P	-39.31	11.6	59.2	-3.391	0.038
		-	6_10 min	1P	30.1	11	52	2.737	0.186
		-	6_10 min	10P	-16.12	11.6	59.2	-1.391	0.925
		-	11_15 min	1P	32.9	11	52	2.992	0.107
		-	11_15 min	10P	-13.66	11.6	59.2	-1.179	0.973
		-	16_20 min	1P	40.19	11	52	3.654	0.019
		-	16_20 min	10P	-11.32	11.6	59.2	-0.976	0.993
		-	test	1P	37.97	11	52	3.452	0.034
		-	test	10P	-30.47	11.6	59.2	-2.628	0.228
	10P	-	6_10 min	1P	69.41	11.6	59.2	5.987	< .001
		-	6_10 min	10P	23.18	10.3	52	2.254	0.435
		-	11_15 min	1P	72.21	11.6	59.2	6.229	< .001
		-	11_15 min	10P	25.64	10.3	52	2.493	0.296
		-	16_20 min	1P	79.49	11.6	59.2	6.857	< .001
		-	16_20 min	10P	27.99	10.3	52	2.721	0.193
		-	test	1P	77.27	11.6	59.2	6.666	< .001
		-	test	10P	8.84	10.3	52	0.859	0.997
6_10 min	1P	-	6_10 min	10P	-46.22	11.6	59.2	-3.987	0.007
		-	11_15 min	1P	2.8	11	52	0.255	1
		-	11_15 min	10P	-43.76	11.6	59.2	-3.775	0.013
		-	16_20 min	1P	10.09	11	52	0.917	0.995
		-	16_20 min	10P	-41.42	11.6	59.2	-3.573	0.023
		-	test	1P	7.87	11	52	0.715	0.999
		-	test	10P	-60.57	11.6	59.2	-5.225	< .001
	10P	-	11_15 min	1P	49.03	11.6	59.2	4.229	0.003
		-	11_15 min	10P	2.46	10.3	52	0.239	1
		-	16_20 min	1P	56.31	11.6	59.2	4.857	< .001
		-	16_20 min	10P	4.81	10.3	52	0.467	1
		-	test	1P	54.09	11.6	59.2	4.666	< .001
		-	test	10P	-14.34	10.3	52	-1.394	0.924
11_15 min	1P	-	11_15 min	10P	-46.57	11.6	59.2	-4.017	0.006
		-	16_20 min	1P	7.28	11	52	0.662	1
		-	16_20 min	10P	-44.22	11.6	59.2	-3.815	0.011
		-	test	1P	5.06	11	52	0.46	1
		-	test	10P	-63.37	11.6	59.2	-5.467	< .001
	10P	-	16_20 min	1P	53.85	11.6	59.2	4.645	< .001
		-	16_20 min	10P	2.35	10.3	52	0.228	1
		-	test	1P	51.63	11.6	59.2	4.454	0.001
		-	test	10P	-16.8	10.3	52	-1.634	0.826
16_20 min	1P	-	16_20 min	10P	-51.5	11.6	59.2	-4.443	0.002
		-	test	1P	-2.22	11	52	-0.202	1
		-	test	10P	-70.65	11.6	59.2	-6.095	< .001
	10P	-	test	1P	49.28	11.6	59.2	4.251	0.003
		-	test	10P	-19.15	10.3	52	-1.862	0.694
test	1P	-	test	10P	-68.43	11.6	59.2	-5.903	< .001
Figure 2.C
MIXED ANOVA
Within Subjects Effects
	Sum of Squares	df	Mean Square	F	p	η²G
session RM	959	1	959	6.1	0.019	0.039
session RM ✻ training	974	1	974	6.2	0.018	0.04
session RM ✻ drug	1982	1	1982	12.61	0.001	0.077
session RM ✻ training ✻ drug	2872	1	2872	18.27	< .001	0.108
Residual	5500	35	157
Between Subjects Effects
	Sum of Squares	df	Mean Square	F	p	η²G
training	14955	1	14955	28.92	< .001	0.388
drug	3014	1	3014	5.83	0.021	0.113
training ✻ drug	3041	1	3041	5.88	0.021	0.114
Residual	18100	35	517
Tukey Post Hoc Comparisons
Comparison
session RM	training	drug		session RM	training	drug	Mean Difference	SE	df	t	ptukey
react	1P	veh	-	react	1P	ani	2.704	8.44	54.5	0.3205	1
			-	react	10P	veh	-20.296	8.44	54.5	-2.4058	0.259
			-	react	10P	ani	-18.296	8.44	54.5	-2.1687	0.386
			-	test	1P	veh	-8.148	5.91	35	-1.3788	0.861
			-	test	1P	ani	39.037	8.44	54.5	4.6271	< .001
			-	test	10P	veh	-18.296	8.44	54.5	-2.1687	0.386
			-	test	10P	ani	-20.407	8.44	54.5	-2.4189	0.253
		ani	-	react	10P	veh	-23	8.21	54.5	-2.8009	0.116
			-	react	10P	ani	-21	8.21	54.5	-2.5574	0.194
			-	test	1P	veh	-10.852	8.44	54.5	-1.2863	0.9
			-	test	1P	ani	36.333	5.61	35	6.4808	< .001
			-	test	10P	veh	-21	8.21	54.5	-2.5574	0.194
			-	test	10P	ani	-23.111	8.21	54.5	-2.8145	0.113
	10P	veh	-	react	10P	ani	2	8.21	54.5	0.2436	1
			-	test	1P	veh	12.148	8.44	54.5	1.4399	0.835
			-	test	1P	ani	59.333	8.21	54.5	7.2256	< .001
			-	test	10P	veh	2	5.61	35	0.3567	1
			-	test	10P	ani	-0.111	8.21	54.5	-0.0135	1
		ani	-	test	1P	veh	10.148	8.44	54.5	1.2029	0.928
			-	test	1P	ani	57.333	8.21	54.5	6.982	< .001
			-	test	10P	veh	-10.00e−7	8.21	54.5	-1.22e−7	1
			-	test	10P	ani	-2.111	5.61	35	-0.3766	1
test	1P	veh	-	test	1P	ani	47.185	8.44	54.5	5.5929	< .001
			-	test	10P	veh	-10.148	8.44	54.5	-1.2029	0.928
			-	test	10P	ani	-12.259	8.44	54.5	-1.4531	0.828
		ani	-	test	10P	veh	-57.333	8.21	54.5	-6.982	< .001
			-	test	10P	ani	-59.444	8.21	54.5	-7.2391	< .001
	10P	veh	-	test	10P	ani	-2.111	8.21	54.5	-0.2571	1
