# Supplementary material for: Noradrenergic projections from the locus coeruleus to the amygdala constrain fear memory reconsolidation
Source: eLife journal article supplement (doi:10.7554/elife.57010), 2020-05-18
Supplement: supp [file elife-57010-supp-v1.zip › elife_poa_e57010_Supplementary_file_2.xlsx]

## Sheet: Figure 3
Figure 3.A, left
One-Way ANOVA
	Sum of Squares	df	Mean Square	F	p	η²
group	112318	2	56159	7.34	0.009	0.572
Residuals	84158	11	7651
Tukey Post-Hoc Test
Comparison
group		group	Mean Difference	SE	df	t	ptukey
HC	-	1P	-184.65	61.8	11	-2.9855	0.031
	-	10P	-5.93	63.9	11	-0.0928	0.995
1P	-	10P	178.72	53	11	3.3743	0.016
Figure 3.A, right
One-Way ANOVA
	Sum of Squares	df	Mean Square	F	p	η²
group	89113	2	44556	18	< .001	0.654
Residuals	47068	19	2477
Tukey Post-Hoc Test
Comparison
group		group	Mean Difference	SE	df	t	ptukey
HC	-	1P	-73.8	25.7	19	-2.87	0.025
	-	10P	-171.6	28.7	19	-5.97	< .001
1P	-	10P	-97.8	25.7	19	-3.81	0.003
Figure 3.B, left
One-Way ANOVA
	Sum of Squares	df	Mean Square	F	p	η²
group	280877	2	140439	7.39	0.003	0.381
Residuals	456127	24	19005
Tukey Post-Hoc Test
Comparison
group		group	Mean Difference	SE	df	t	ptukey
HC	-	1P 1H	-0.15	71.2	24	-0.00211	1
	-	1P 24H	-207.673	70	24	-2.96818	0.018
1P 1H	-	1P 24H	-207.523	60.2	24	-3.4452	0.006
Figure 3.B, right
One-Way ANOVA
	Sum of Squares	df	Mean Square	F	p	η²
group	70634	2	35317	5.74	0.014	0.434
Residuals	92277	15	6152
Tukey Post-Hoc Test
Comparison
group		group	Mean Difference	SE	df	t	ptukey
HC	-	1P 1H	-144.3	50.6	15	-2.851	0.031
	-	1P 24H	-18.4	48	15	-0.384	0.922
1P 1H	-	1P 24H	125.9	42.4	15	2.972	0.024
Figure 3.C, left
One-Way ANOVA
	Sum of Squares	df	Mean Square	F	p	η²
group	3750000	2	1880000	5.46	0.012	0.342
Residuals	7220000	21	343788
Tukey Post-Hoc Test
Comparison
group		group	Mean Difference	SE	df	t	ptukey
HC	-	10P_1H	-911.16	309	21	-2.9485	0.02
	-	10P_24H	-914.78	309	21	-2.9602	0.02
10P_1H	-	10P_24H	-3.62	276	21	-0.0131	1
Figure 3.C, right
One-Way ANOVA
	Sum of Squares	df	Mean Square	F	p	η²
group	110	2	54.8	0.024	0.976	0.004
Residuals	27453	12	2287.7
Tukey Post-Hoc Test
Comparison
group		group	Mean Difference	SE	df	t	ptukey
HC	-	10P_1H	7.63	34.9	12	0.218	0.974
	-	10P_24H	4.39	33	12	0.133	0.99
10P_1H	-	10P_24H	-3.24	28	12	-0.116	0.993
