# Supplementary material for: Noradrenergic projections from the locus coeruleus to the amygdala constrain fear memory reconsolidation
Source: eLife journal article supplement (doi:10.7554/elife.57010), 2020-05-18
Supplement: supp [file elife-57010-supp-v1.zip › elife_poa_e57010_Supplementary_file_3.xlsx]

## Sheet: Figure 4
Figure 4.A, left
Independent Samples T-Test
		statistic	df	p	Cohen's d
glun2b	Student's t	-2.47	17	0.025	-1.13
Figure 4.A, right
Independent Samples T-Test
		statistic	df	p	Cohen's d
glua2	Student's t	2.41	9	0.039	1.46
Figure 4.B
3-way ANOVA
	Sum of Squares	df	Mean Square	F	p	η²p
drug1	1371	1	1371	6.4	0.014	0.106
drug2	1624	1	1624	7.58	0.008	0.123
session	2231	1	2231	10.42	0.002	0.162
drug1 ✻ drug2	446	1	446	2.08	0.155	0.037
drug1 ✻ session	3939	1	3939	18.39	< .001	0.254
drug2 ✻ session	1586	1	1586	7.41	0.009	0.121
drug1 ✻ drug2 ✻ session	887	1	887	4.14	0.047	0.071
Residuals	11568	54	214
Tukey Post Hoc Comparisons
Comparison
drug1	drug2	session		drug1	drug2	session	Mean Difference	SE	df	t	ptukey	Cohen's d
veh	veh	reactivation	-	veh	veh	test	-6.5071	7.82	54	-0.8318	0.99	0.03752
			-	veh	anisomycin	reactivation	2.3214	7.57	54	0.3065	1	0.0136
			-	veh	anisomycin	test	0.9314	7.57	54	0.123	1	0.00546
			-	propranolol	veh	reactivation	-4.3436	7.57	54	-0.5734	0.999	0.02545
			-	propranolol	veh	test	5.9327	7.57	54	0.7832	0.993	0.03477
			-	propranolol	anisomycin	reactivation	-6.4286	7.57	54	-0.8487	0.989	0.03767
			-	propranolol	anisomycin	test	39.2664	7.57	54	5.1837	< .001	0.23011
		test	-	veh	anisomycin	reactivation	8.8286	7.57	54	1.1655	0.938	0.05174
			-	veh	anisomycin	test	7.4386	7.57	54	0.982	0.975	0.04359
			-	propranolol	veh	reactivation	2.1636	7.57	54	0.2856	1	0.01268
			-	propranolol	veh	test	12.4398	7.57	54	1.6422	0.723	0.0729
			-	propranolol	anisomycin	reactivation	0.0786	7.57	54	0.0104	1	0.00046
			-	propranolol	anisomycin	test	45.7736	7.57	54	6.0428	< .001	0.26825
	anisomycin	reactivation	-	veh	anisomycin	test	-1.39	7.32	54	-0.1899	1	0.00829
			-	propranolol	veh	reactivation	-6.665	7.32	54	-0.9108	0.984	0.03974
			-	propranolol	veh	test	3.6112	7.32	54	0.4935	1	0.02153
			-	propranolol	anisomycin	reactivation	-8.75	7.32	54	-1.1957	0.93	0.05217
			-	propranolol	anisomycin	test	36.945	7.32	54	5.0485	< .001	0.22028
		test	-	propranolol	veh	reactivation	-5.275	7.32	54	-0.7208	0.996	0.03145
			-	propranolol	veh	test	5.0012	7.32	54	0.6834	0.997	0.02982
			-	propranolol	anisomycin	reactivation	-7.36	7.32	54	-1.0057	0.972	0.04388
			-	propranolol	anisomycin	test	38.335	7.32	54	5.2384	< .001	0.22856
propranolol	veh	reactivation	-	propranolol	veh	test	10.2763	7.32	54	1.4042	0.851	0.06127
			-	propranolol	anisomycin	reactivation	-2.085	7.32	54	-0.2849	1	0.01243
			-	propranolol	anisomycin	test	43.61	7.32	54	5.9592	< .001	0.26001
		test	-	propranolol	anisomycin	reactivation	-12.3612	7.32	54	-1.6891	0.694	0.0737
			-	propranolol	anisomycin	test	33.3338	7.32	54	4.555	< .001	0.19874
	anisomycin	reactivation	-	propranolol	anisomycin	test	45.695	7.32	54	6.2441	< .001	0.27244
