# Supplementary material for: Noradrenergic projections from the locus coeruleus to the amygdala constrain fear memory reconsolidation
Source: eLife journal article supplement (doi:10.7554/elife.57010), 2020-05-18
Supplement: supp [file elife-57010-supp-v1.zip › elife_poa_e57010_Supplementary_file_4.xlsx]

## Sheet: Figure 5
Figure 5.A
Independent Samples T-Test
		statistic	df	p	Cohen's d
c-fos	Student's t	-4.35	4	0.012	-3.55
Figure 5.D
3-way ANOVA
	Sum of Squares	df	Mean Square	F	p	η²p
dreadds	2637	1	2637	10.7	0.002	0.165
drug	3346	1	3346	13.58	< .001	0.201
session	6420	1	6420	26.05	< .001	0.325
dreadds ✻ drug	343	1	343	1.39	0.243	0.025
dreadds ✻ session	2078	1	2078	8.43	0.005	0.135
drug ✻ session	3347	1	3347	13.58	< .001	0.201
dreadds ✻ drug ✻ session	2035	1	2035	8.26	0.006	0.133
Residuals	13308	54	246
Tukey Post Hoc Comparisons
Comparison
dreadds	drug	session		dreadds	drug	session	Mean Difference	SE	df	t	ptukey	Cohen's d
tdtomato	vehicle	reactivation	-	tdtomato	vehicle	test	5.57	7.4	54	0.752	0.995	0.033
			-	tdtomato	anisomycin	reactivation	6.79	7.91	54	0.858	0.989	0.03893
			-	tdtomato	anisomycin	test	18.86	7.91	54	2.384	0.27	0.10817
			-	hm4di	vehicle	reactivation	8.26	7.91	54	1.045	0.965	0.04739
			-	hm4di	vehicle	test	14.07	7.91	54	1.779	0.637	0.0807
			-	hm4di	anisomycin	reactivation	1.47	7.63	54	0.193	1	0.0086
			-	hm4di	anisomycin	test	59.87	7.63	54	7.849	< .001	0.34964
		test	-	tdtomato	anisomycin	reactivation	1.22	7.91	54	0.154	1	0.007
			-	tdtomato	anisomycin	test	13.3	7.91	54	1.681	0.699	0.07625
			-	hm4di	vehicle	reactivation	2.7	7.91	54	0.341	1	0.01547
			-	hm4di	vehicle	test	8.51	7.91	54	1.075	0.959	0.04878
			-	hm4di	anisomycin	reactivation	-4.09	7.63	54	-0.537	0.999	0.02391
			-	hm4di	anisomycin	test	54.31	7.63	54	7.119	< .001	0.31713
	anisomycin	reactivation	-	tdtomato	anisomycin	test	12.08	8.39	54	1.439	0.835	0.06724
			-	hm4di	vehicle	reactivation	1.48	8.39	54	0.176	1	0.00822
			-	hm4di	vehicle	test	7.29	8.39	54	0.868	0.988	0.04056
			-	hm4di	anisomycin	reactivation	-5.32	8.12	54	-0.654	0.998	0.03008
			-	hm4di	anisomycin	test	53.08	8.12	54	6.534	< .001	0.30038
		test	-	hm4di	vehicle	reactivation	-10.6	8.39	54	-1.263	0.908	0.05902
			-	hm4di	vehicle	test	-4.79	8.39	54	-0.571	0.999	0.02667
			-	hm4di	anisomycin	reactivation	-17.39	8.12	54	-2.141	0.403	0.09841
			-	hm4di	anisomycin	test	41.01	8.12	54	5.047	< .001	0.23204
hm4di	vehicle	reactivation	-	hm4di	vehicle	test	5.81	8.39	54	0.692	0.997	0.03235
			-	hm4di	anisomycin	reactivation	-6.79	8.12	54	-0.836	0.99	0.03843
			-	hm4di	anisomycin	test	51.61	8.12	54	6.352	< .001	0.29202
		test	-	hm4di	anisomycin	reactivation	-12.6	8.12	54	-1.551	0.776	0.07131
			-	hm4di	anisomycin	test	45.8	8.12	54	5.637	< .001	0.25915
	anisomycin	reactivation	-	hm4di	anisomycin	test	58.4	7.85	54	7.44	< .001	0.33621
